# Supplementary material for: Effectiveness of the implementation of a perinatal bereavement care training programme on nurses and midwives: protocol for a mixed-method study
Source: HighWire-hosted journal article supplement (doi:10.1136/bmjopen-2021-059660), 2022-08-01
Supplement: bmjopen-2021-059660supp001_data_supplement.pdf [file bmjopen-2021-059660supp001_data_supplement.pdf]

**Supplementary file: Table 1 Characteristics of experts (N=17)**

| Characteristic      |                       | n  | %    | Characteristic         |                         | n   | %    |
|---------------------|-----------------------|----|------|------------------------|-------------------------|-----|------|
| Age (years)         | 30-40                 | 8  | 47.1 | Job title              | Intermediate grade      | 13  | 76.5 |
|                     | 41-50                 | 8  | 47.1 |                        | High professional title | 4   | 23.5 |
|                     | >50                   | 1  | 5.8  | Health service regions | Obstetric care          | 8   | 47.1 |
| Years of experience | 10-19                 | 11 | 64.7 |                        | Midwifery care          | 8   | 47.1 |
|                     | >20                   | 6  | 35.3 | Perinatal psychology   | 1                       | 5.8 |      |
| Education level     | Undergraduate         | 15 | 88.2 |                        |                         |     |      |
|                     | Postgraduate or above | 2  | 11.8 |                        |                         |     |      |
